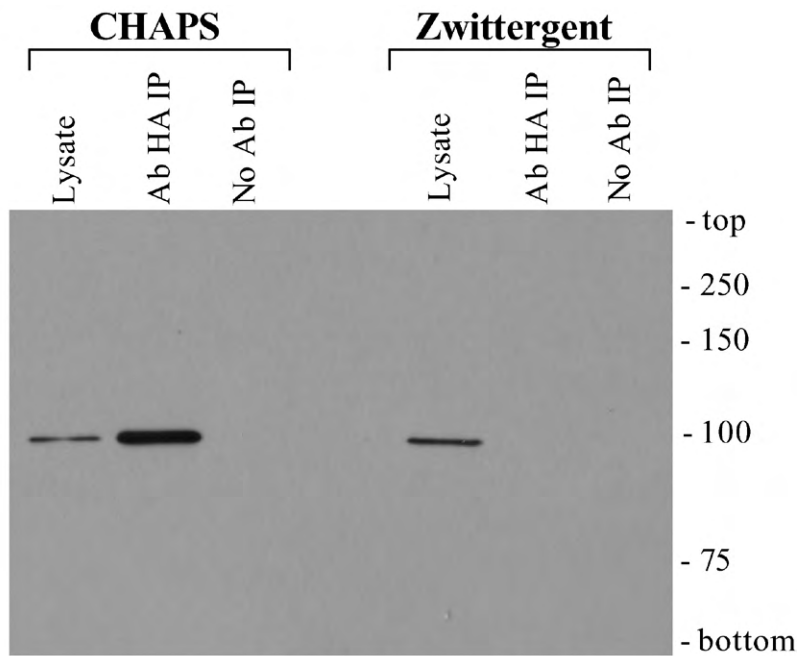

**Fig. S1. RyR2 N-terminus self-interaction is abolished by zwittergent 3-14.** Co-immunoprecipitation assays from HEK293 cell lysate co-expressing cMyc-tagged (BT4L) and HA-tagged (AD4L) RyR2 residues 1-906, pre-treated with 10 mM DTT. AD4L was immunoprecipitated with Ab<sup>HA</sup> from either CHAPS- or zwittergent 3-14-solubilized HEK293 lysate and the presence of associated BT4L was analyzed by SDS-PAGE (6% gel) and immunoblotting using Ab<sup>cMyc</sup>. Cell lysate, 1/50<sup>th</sup> of the volume processed in IP samples, was also included to serve as molecular weight standard.

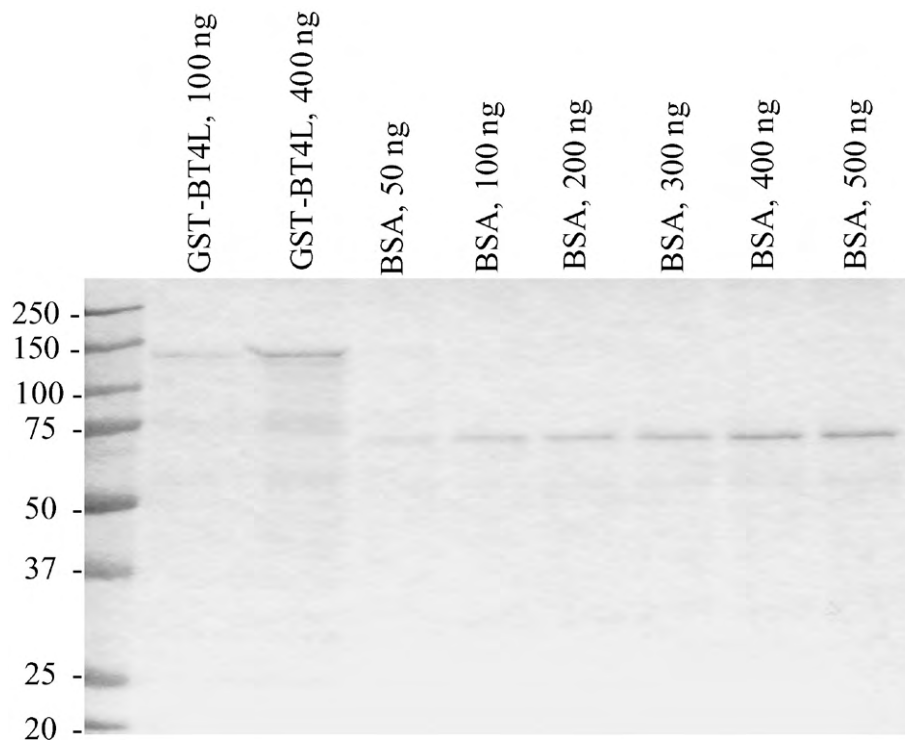

**Fig. S2. Bacterially expressed and purified RyR2 N-terminal fragment (GST-BT4L).** Coomassie-stained SDS-PAGE gel of purified GST-BT4L together with known amounts of bovine serum albumin (BSA).

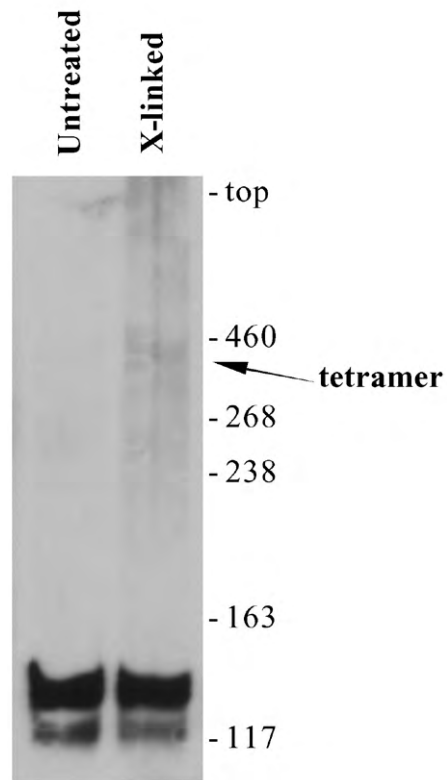

**Fig. S3. Chemical cross-linking of purified GST-BT4L shows tetramer formation.** Purified GST-BT4L was reacted with 0.0025% glutaraldehyde for 10 min and analyzed by SDS-PAGE (4% gel) and immunoblotting using Ab<sup>GST</sup>.

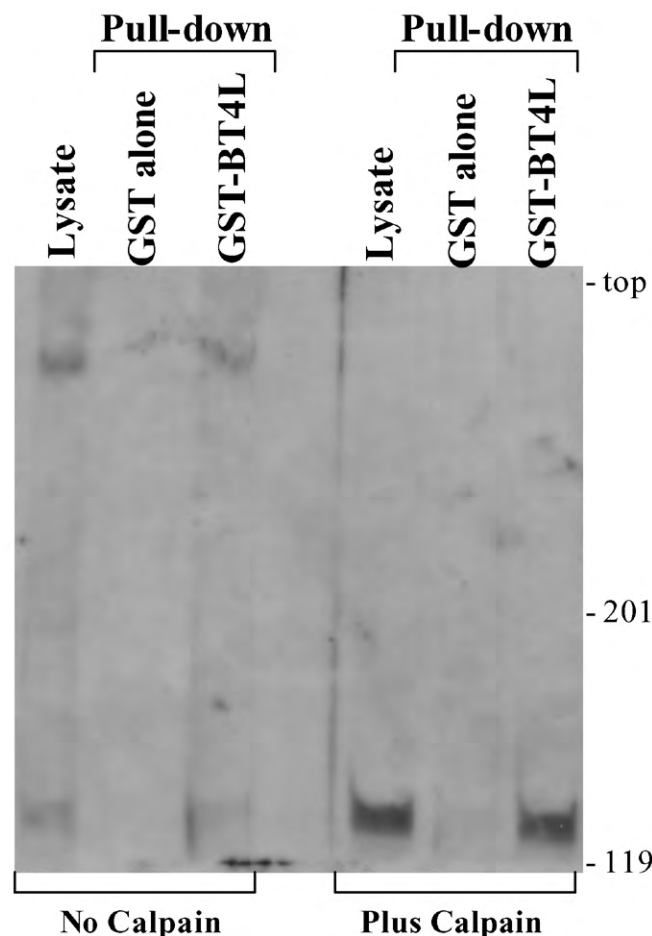

**Fig. S4. GST pull-down assay shows BT4L interaction with native RyR2.** Pig cardiac SR vesicles (500  $\mu$ g), treated with or without 20 units of calpain-2 for 2 min, were solubilized overnight in buffer (20mM Tris, 150 mM NaCl, 0.4% CHAPS, 2 mM DTT, pH 7.4) and the insoluble material removed by centrifugation. Solubilised SR proteins were mixed with 100 nM GST-BT4L or 1  $\mu$ M GST alone captured on glutathione-sepharose 4B beads, and incubated overnight at 4°C. Beads were washed twice and eluted proteins were analyzed by SDS-PAGE (4% gel) and immunoblotting using Ab<sup>B2</sup>. Lysate (~25 $\mu$ g) was also included.

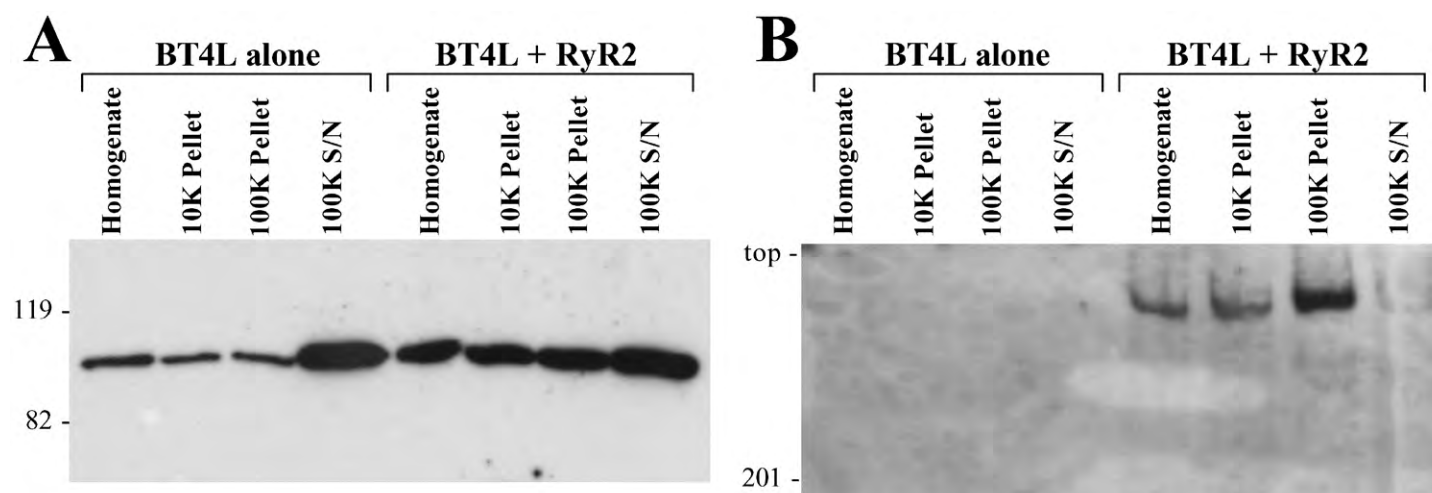

**Fig. S5. BT4L associates with microsomal membranes upon co-expression with RyR2.** Sub-fractionation of HEK293 cells expressing BT4L alone or RyR2 with BT4L, and immunoblotting using (BT4L) Ab<sup>cMyc</sup> (A) or (RyR2) Ab<sup>1093</sup> (B).

**Table S1. Native RyR2 displays increased [<sup>3</sup>H]ryanodine binding in the presence of GST-BT4L.**

|                                                | GST  | BT4L | GST   | BT4L | GST   | BT4L  | GST   | BT4L   | GST    | BT4L   | GST    | BT4L   | GST    | BT4L   | GST    | BT4L   |
|------------------------------------------------|------|------|-------|------|-------|-------|-------|--------|--------|--------|--------|--------|--------|--------|--------|--------|
| <b>Free [Ca<sup>2+</sup>]</b>                  | 50nM |      | 100nM |      | 250nM |       | 1μM   |        | 10μM   |        | 50μM   |        | 100μM  |        | 500μM  |        |
| <b>fmol [<sup>3</sup>H]ryanodine per mg SR</b> | 2.22 | 4.22 | 4.34  | 9.91 | 10.71 | 16.55 | 96.85 | 119.16 | 147.93 | 167.36 | 191.44 | 197.12 | 149.02 | 157.67 | 179.11 | 181.95 |
| <b>standard error</b>                          | 2.63 | 3.6  | 3.78  | 2.95 | 1.16  | 1.68  | 5.79  | 5.58   | 3.77   | 7.96   | 5.69   | 3.5    | 1.01   | 2.26   | 6.35   | 9.92   |

**Table S1. Native RyR2 displays increased [<sup>3</sup>H]ryanodine binding in the presence of GST-BT4L.** [<sup>3</sup>H]Ryanodine binding assays of pig cardiac SR incubated with 10nM GST-BT4L or 100nM GST alone, over a wide range of free Ca<sup>2+</sup> concentrations. Data are expressed as mean value ± standard error of the mean.
